# Supplementary material for: Water Budget for Lake Trafford, a Natural Subtropical Lake in South Florida: An Example of Enhanced Groundwater Influx in a Subtropical Lake Subsequent to Organic Sediment Dredging
Source: Preprints.org preprint supplement (doi:10.20944/preprints202403.0908.v1), 2024-03-15
Supplement: Supplementary file 1 [file supplementary]

Supplementary materials


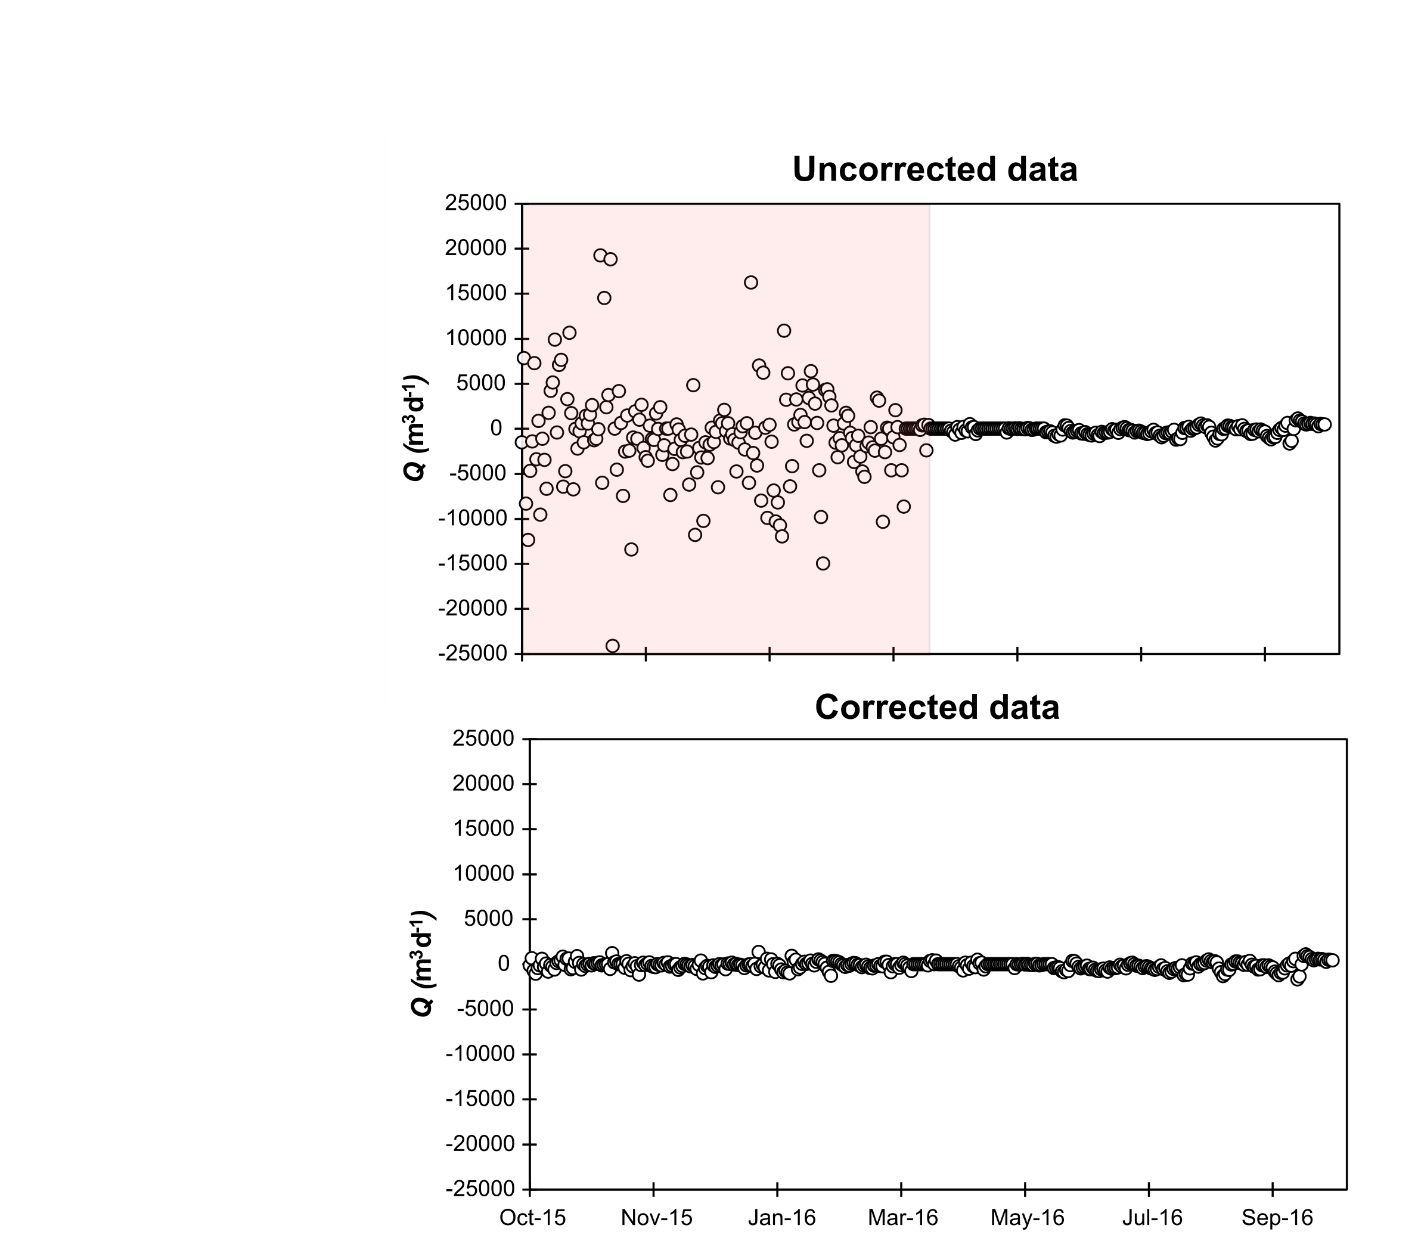


Figure S1: Scatterplots of discharge from Canal 3 before correction (pink area; top) and after correction (bottom). Standard deviation of high noise data was compared to low noise data (post-Sontek error correction) and the ratio was used has a devisor for the high noise data set.


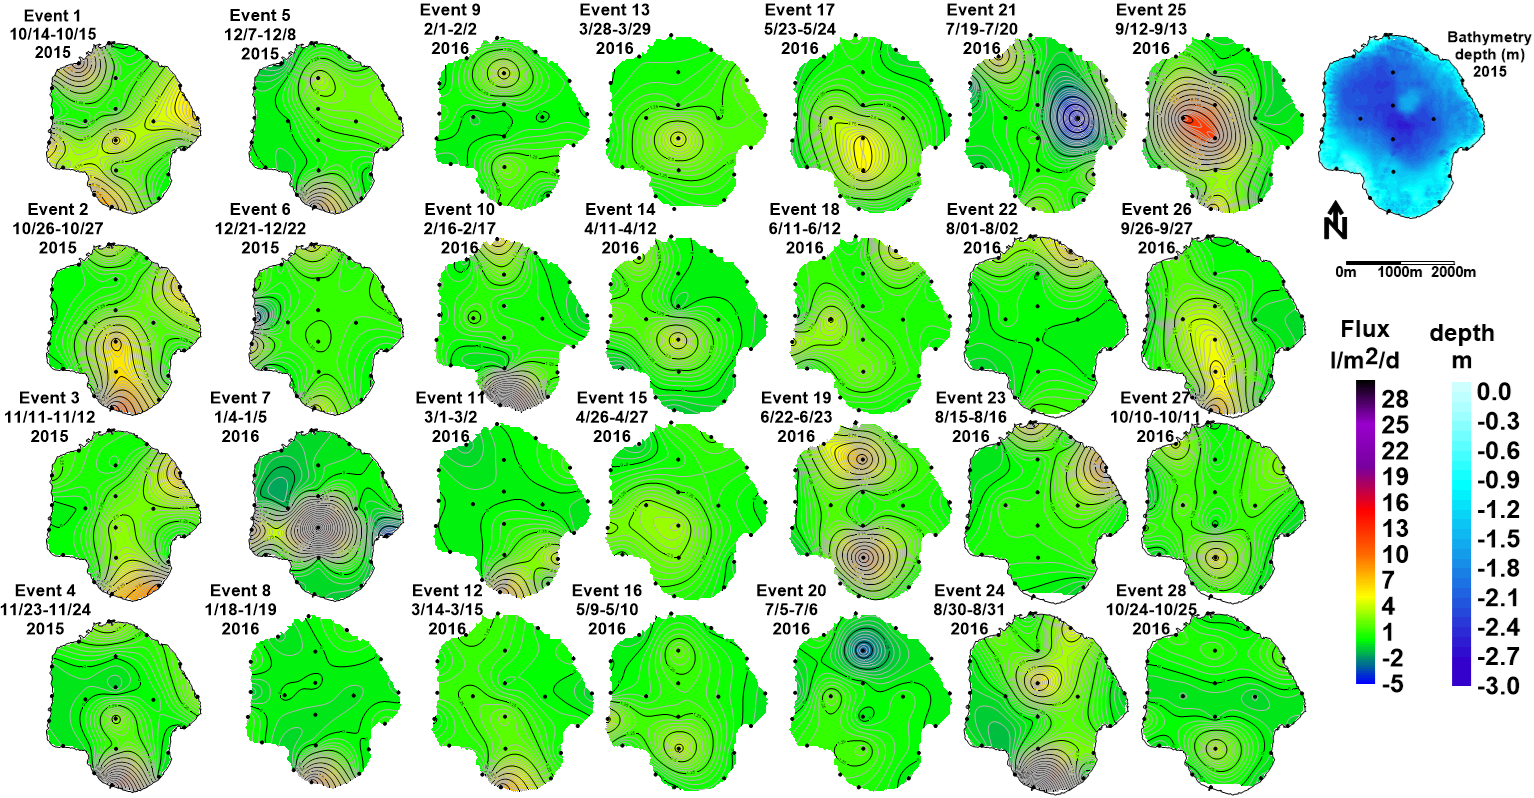


Figure S2: Maps of interpolated groundwater discharge for all 28 events. The bathymetry of Lake Trafford (top right) is also provided.


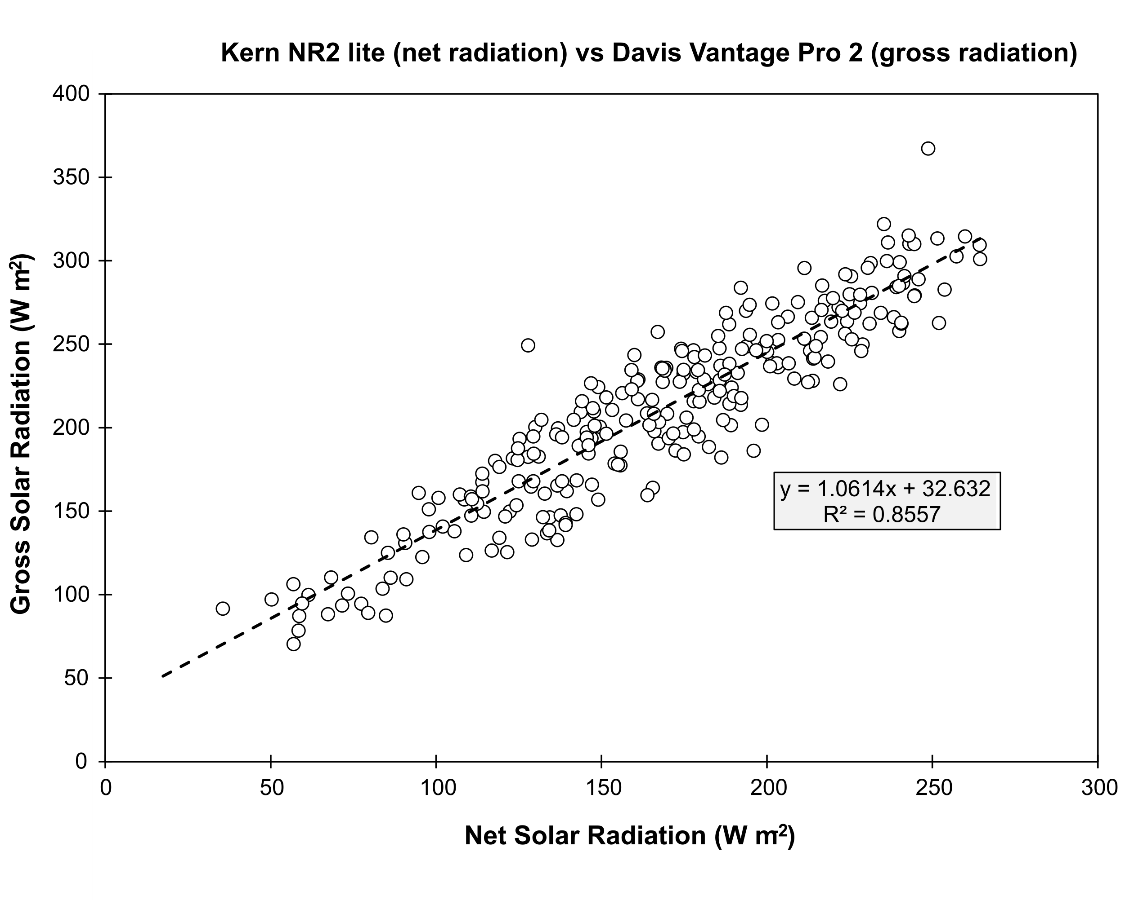
Figure S3: Scatterplot of daily averages of gross solar radiation from the Davis weather station and net solar radiation from the Kern NR2 Lite.
